# Supplementary material for: Comparing Health Outcomes of Privileged US Citizens With Those of Average Residents of Other Developed Countries
Source: PubMed Central journal article supplement (PMC7770612; doi:10.1001/jamainternmed.2020.7484), 2020-12-28
Supplement: jamainternmed-e207484-s001.pdf [file jamainternmed-e207484-s001.pdf]

## Supplementary Online Content

Emanuel EJ, Gudbranson E, Van Parys J, Gørtz M, Helgeland J, Skinner J. Comparing health outcomes of privileged US citizens with those of average residents of other developed countries. *JAMA Intern Med*. Published online December 28, 2020. doi:10.1001/jamainternmed.2020.7484

**eTable 1.** National Characteristics by Country

**eTable 2.** Comparison of Infant Mortality Rates

**eTable 3.** Comparison of Maternal Mortality Rates

**eTable 4.** Comparison of 5-Year Survival Rates for Breast and Colon Cancer and Childhood ALL

**eTable 5.** Comparison of 30-Day Mortality After Acute Myocardial Infarction

**eFigure.** Adjusted Case Fatality Rate for Comparison Countries and the US for Overall, Top 1% and Top 5% Counties by Income, 2013-14

**eAppendix 1.** Statistical Appendix

**eAppendix 2.** List of 157 Highest-Incomes Counties in the US

This supplementary material has been provided by the authors to give readers additional information about their work.

**eTable 1.** National Characteristics by Country

| <b>Group</b>         | <b>Country</b>                | <b>Average Annual Wages PPP (2015)*</b> | <b>Health Expenditures per Capita, USD (2015)+</b> | <b>Life Expectancy (2015)</b> |
|----------------------|-------------------------------|-----------------------------------------|----------------------------------------------------|-------------------------------|
| USA                  | Whites in 1% Richest Counties | \$100,524                               | NA                                                 | NA                            |
|                      | Whites in 5% Richest Counties | \$83,639                                | NA                                                 | NA                            |
|                      | All                           | \$60,692                                | \$9,491                                            | 78.7                          |
| Comparison Countries | Australia                     | \$49,563                                | \$4414                                             | 82.5                          |
|                      | Austria                       | \$49,965                                | \$5159                                             | 81.7                          |
|                      | Canada                        | \$47,673                                | \$4633                                             | 81.9                          |
|                      | Denmark                       | \$51,126                                | \$5001                                             | 80.8                          |
|                      | Finland                       | \$42,885                                | \$4099                                             | 81.6                          |
|                      | France                        | \$42,731                                | \$4657                                             | 82.4                          |
|                      | Germany                       | \$46,409                                | \$5297                                             | 80.7                          |
|                      | Japan                         | \$40,004                                | \$4428                                             | 83.9                          |
|                      | Netherlands                   | \$53,171                                | \$5148                                             | 81.6                          |
|                      | Norway                        | \$51,663                                | \$6239                                             | 82.4                          |
|                      | Sweden                        | \$41,467                                | \$5272                                             | 82.3                          |
|                      | Switzerland                   | \$62,495                                | \$7570                                             | 83.0                          |

All data from OECD

\* Average Annual Wages (PPP) from

[https://stats.oecd.org/Index.aspx?DataSetCode=AV\\_AN\\_WAGE](https://stats.oecd.org/Index.aspx?DataSetCode=AV_AN_WAGE)

+ Health Expenditures per capita from [OECD \(2019\), Health spending \(indicator\)](#). doi: [10.1787/8643de7e-en](https://doi.org/10.1787/8643de7e-en) (Accessed on 03 April 2019)

**eTable 2.** Comparison of Infant Mortality Rates

| <b>Group</b>            | <b>Country</b>                   | <b>Infant Mortality<br/>(deaths / 1,000 live<br/>births),<br/>2015</b> | <b>Number of Top 5%<br/>Richest USA Counties<br/>Below the Infant<br/>Mortality Rate of the<br/>Comparison Country</b> |
|-------------------------|----------------------------------|------------------------------------------------------------------------|------------------------------------------------------------------------------------------------------------------------|
| USA                     | Whites in 1%<br>Richest Counties | 3.54                                                                   | NA                                                                                                                     |
|                         | Whites in 5%<br>Richest Counties | 4.01                                                                   | NA                                                                                                                     |
|                         | Overall                          | 5.90                                                                   | NA                                                                                                                     |
| Comparison<br>Countries | Australia                        | 3.20                                                                   | 17                                                                                                                     |
|                         | Austria                          | 3.10                                                                   | 14                                                                                                                     |
|                         | Canada                           | 4.70                                                                   | 139                                                                                                                    |
|                         | Denmark                          | 3.70                                                                   | 38                                                                                                                     |
|                         | Finland                          | 1.70                                                                   | 0                                                                                                                      |
|                         | France                           | 3.70                                                                   | 38                                                                                                                     |
|                         | Germany                          | 3.30                                                                   | 20                                                                                                                     |
|                         | Japan                            | 1.90                                                                   | 0                                                                                                                      |
|                         | Netherlands                      | 3.30                                                                   | 20                                                                                                                     |
|                         | Norway                           | 2.30                                                                   | 2                                                                                                                      |
|                         | Sweden                           | 2.50                                                                   | 7                                                                                                                      |
|                         | Switzerland                      | 3.90                                                                   | 115                                                                                                                    |

**eTable 3.** Comparison of Maternal Mortality Rates

| <b>Group</b>            | <b>Country</b>                   | <b>Maternal Mortality<br/>(deaths / 100,000 births),<br/>2015</b> |
|-------------------------|----------------------------------|-------------------------------------------------------------------|
| USA                     | Whites in 1%<br>Richest Counties | 10.05                                                             |
|                         | Whites in 5%<br>Richest Counties | 10.85                                                             |
|                         | Overall                          | 26.40                                                             |
| Comparison<br>Countries | Australia                        | 2.60                                                              |
|                         | Austria                          | 4.70                                                              |
|                         | Canada                           | 6.00                                                              |
|                         | Denmark                          | 0.00                                                              |
|                         | Finland                          | 3.60                                                              |
|                         | France                           | 5.10                                                              |
|                         | Germany                          | 3.30                                                              |
|                         | Japan                            | 4.40                                                              |
|                         | Netherlands                      | 3.50                                                              |
|                         | Norway                           | 0.00                                                              |
|                         | Sweden                           | 0.90                                                              |
|                         | Switzerland                      | 2.40                                                              |

**eTable 4.** Comparison of 5-Year Survival Rates for Breast and Colon Cancer and Childhood ALL

| <b>Group</b>         | <b>Country</b>                | <b>Breast Cancer</b> | <b>Colon Cancer</b>  | <b>Childhood Acute Lymphocytic Leukemia (ALL)</b> |
|----------------------|-------------------------------|----------------------|----------------------|---------------------------------------------------|
| USA                  | Whites in 5% Richest Counties | 92.0%<br>(91.7-92.3) | 67.2%<br>(66.7-67.7) | 92.6%<br>(90.7-94.2)                              |
|                      | Overall                       | 90.2%<br>(90.1-90.4) | 64.9%<br>(64.7-65.1) | 89.5%<br>(88.8-90.3)                              |
| Comparison Countries | Australia                     | 89.5%<br>(89.1-90.0) | 70.7%<br>(70.1-71.2) | 90.7%<br>(88.3-93.1)                              |
|                      | Austria                       | 84.8%<br>(84.1-85.5) | 63.7%<br>(62.7-64.7) | NA                                                |
|                      | Canada                        | 88.2%<br>(87.8-88.6) | 67.0%<br>(66.5-67.5) | 92.6%<br>(90.7-94.6)                              |
|                      | Denmark                       | 86.1%<br>(85.4-86.9) | 61.6%<br>(60.6-62.7) | 94.0%<br>(90.1-97.9)                              |
|                      | Finland                       | 88.5%<br>(87.7-89.3) | 64.9%<br>(63.7-66.2) | 95.2%<br>(91.5-98.9)                              |
|                      | France                        | 86.7%<br>(85.5-88.0) | 63.7%<br>(62.2-65.3) | 88.6%<br>(86.5-90.8)                              |
|                      | Germany                       | 86.0%<br>(85.7-86.4) | 64.8%<br>(64.3-65.3) | 91.1%<br>(87.4-94.8)                              |
|                      | Japan                         | 89.4%<br>(88.9-89.9) | 67.8%<br>(67.3-68.4) | 87.6%<br>(84.2-91.0)                              |
|                      | Netherlands                   | 86.6%                | 63.1%                | 90.4%                                             |

|  |             |                      |                      |                      |
|--|-------------|----------------------|----------------------|----------------------|
|  |             | (86.1-87.1)          | (62.5-63.7)          | (87.5-93.3)          |
|  | Norway      | 87.7%<br>(86.6-88.8) | 66.7%<br>(65.6-67.8) | 83.0%<br>(76.5-89.5) |
|  | Sweden      | 88.8%<br>(88.2-89.4) | 64.9%<br>(64.0-65.8) | 89.0%<br>(84.6-93.3) |
|  | Switzerland | 86.2%<br>(85.1-87.3) | 67.3%<br>(65.7-68.9) | 90.3%<br>(86.1-94.5) |

:

**eTable 5.** Comparison of 30-Day Mortality After Acute Myocardial Infarction

| Country                                        | (Deaths / 100 AMI hospitalizations) |       |       |       |       |       |
|------------------------------------------------|-------------------------------------|-------|-------|-------|-------|-------|
|                                                | Overall                             | 65-69 | 70-74 | 75-79 | 80-84 | 85+   |
| USA Whites in 1% Richest Counties (N = 10,229) | 12.76                               | 6.06  | 7.47  | 9.98  | 13.22 | 23.30 |
| USA Whites in 5% Richest Counties (N = 46,382) | 12.40                               | 6.02  | 7.47  | 10.33 | 13.55 | 22.46 |
| USA—Overall (N = 391,978)                      | 13.45                               | 6.73  | 8.62  | 11.01 | 14.59 | 23.34 |
| Denmark (N = 15,567)                           | 10.73                               | 3.85  | 5.82  | 8.94  | 12.12 | 21.56 |
| Norway (N = 18,564)                            | 10.18                               | 3.38  | 4.80  | 8.52  | 11.44 | 21.51 |

U.S. data is for 2013-15 in the fee-for-service Medicare population age 65+. Denmark data is for 2012-14, and Norway for 2013-15, both covering the entire population age 65+. Age-specific rates (and overall rates) are weighted by the sex distribution (and the age-sex distribution) for the Medicare U.S. population.

**eFigure.** Adjusted Case Fatality Rate for Comparison Countries and the US for Overall, Top 1% and Top 5% Counties by Income, 2013-14

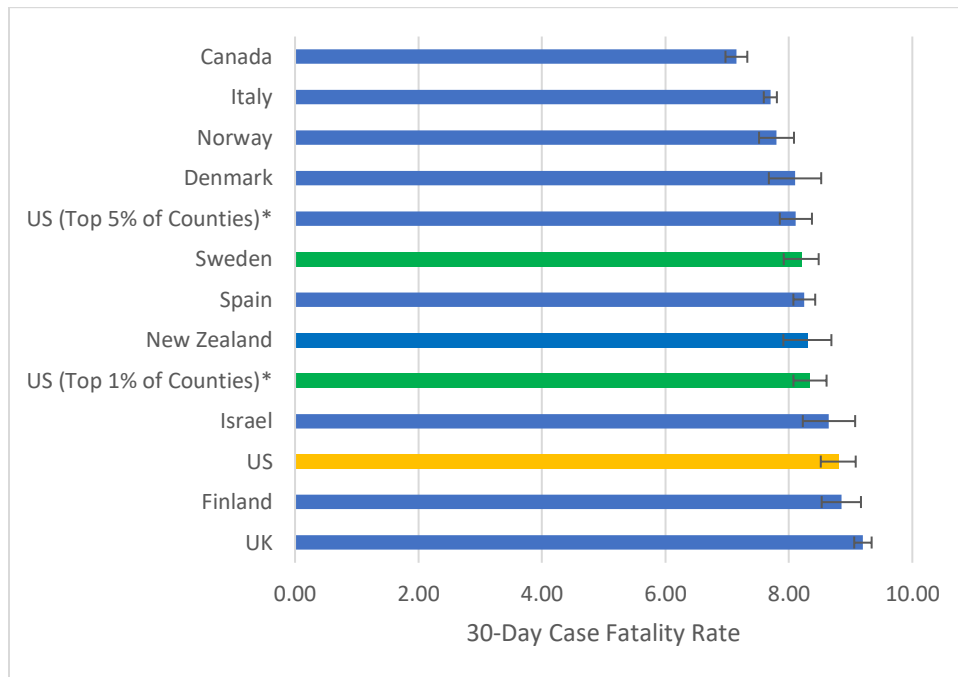

Notes: Data based on OECD health indicators for linked 30-day mortality, 2013-14. \*The adjustments to US data by income group are made using the Medicare claims data (2013-15); see text and eAppendix 1 for details.



## **eAppendix 1.** Statistical Appendix

### **1. Micro-Level Data Analysis for Acute Myocardial Infarction**

This appendix focuses on the data analysis for acute myocardial infarction (AMI). We first consider the micro-level analysis for the 65+ population in three countries with high-quality data from the U.S., Denmark, and Norway, and then the OECD data for ages 45+.

#### *1. Micro-level claims data for the U.S., Denmark, and Norway*

For the U.S. data, AMI was both the primary admitting diagnosis and the patient's first AMI hospitalization using ICD-9 codes 410.xx [except 410.x2]. The Master Beneficiary Summary File is used to identify dates of death for patients in this sample. We calculate the shares of patients by age group (65-69, 70-74, 75-79, 80-84, 85+) and sex who died within 30-days of their first AMI hospitalization observed during 2013-14.

For the US data, the 30-day case fatality rate is 13.5% (14.6% for women, 12.4% for men; mortality for women is higher because the age distribution for AMI is more heavily weighted towards older ages for women). For whites in the top 5% of counties, the case fatality rate is 12.4%; thus the ratio (or adjustment factor for whites in the highest-income US counties to the US average is the ratio, or 0.92.

We collect similar data from Denmark (2012-14) and Norway (2013-15) for the entire populations age 65+. In both countries, the sample was created using ICD10 codes I21.1-I21.4, and I21.9. In Norway, the case fatality rate (weighted by US population weights for age and sex)

is 10.2% (11.7% for women, 8.8% for men), N = 20,496. The corresponding measures for Denmark is 10.7% (12.8% for women, 8.8% for men), N = 15,567.

## 2. OECD estimates and potential biases

We rely primarily on the publicly available OECD data age 45+ for the U.S. and 10 comparison high-income countries with available data for 2013-14. We are limited to 2013-14 in the OECD data because there is no more recent data available for U.S. 30-day mortality (case fatality) following the AMI. To calculate rates for the 45+ population in high-income countries, we apply the ratio 0.92 (derived above) to the overall OECD data for the U.S. That is, our estimate for the highest-income 5% of U.S. counties, 8.1, is equal to  $0.92 \times 8.8$  per 100 AMI admissions; for the highest-income 1%, it is 8.4 ( $0.95 \times 8.8$ ).

For OECD data, we combined two years of data and implemented confidence intervals reflecting both the reported annual confidence intervals and the two-year variability in rates across years. (We assumed a binary distribution for mortality at the individual level, which allowed us to recover sample sizes from each year's sample; this was then used to create confidence intervals for the combined two-year samples under the assumption that the samples in each year were independently drawn and equal in number).

As noted above, we used the linked hospitalization data to better capture true 30-day mortality, but there are more recent "unlinked" OECD data from 2016 that suggest a somewhat better ranking for the U.S. compared to other countries reporting data in that year. However, as has been pointed out by Drye et al. (2012), the link between in-hospital mortality and the corresponding 30-day mortality rate can be tenuous, most notably because differences in average length of stay differs so much across hospitals (as in Drye et al, 2012), or across countries. For

example, even if 30-day mortality rates were identical in the U.S. and Great Britain, it is more likely that an AMI patient will die in hospital in Great Britain because average length of stay for AMI patients was 9.8 days compared to just 4.8 days in the U.S in 2010, the most recent data available (<https://stats.oecd.org/Index.aspx?QueryId=51881>).

Because there are no linked national databases for the general U.S. population between ages 45-64, the OECD used data from the Healthcare Cost and Utilization Project (HCUP) for a select group of states that are able to track readmissions from one hospital to another; one may then estimate case-fatality from either mortality occurring during the initial hospital admission, or during a readmission, but not if the death occurs outside of the hospital.

For this reason, U.S. case-fatality estimates are likely to be biased downward compared to other countries because they miss out-of-hospital deaths. For example, when we use the simple adjustment described above for the top 5% of counties to the U.S. average of 8.8%, the implied 30-day mortality rate is 8.1 percent, identical to the corresponding rate in Denmark. Yet as we have seen from the micro-level Danish (and Norwegian) universal data, mortality rates in the age 65+ population are consistently lower than U.S. mortality rates for higher-income counties and zip codes. If instead we calibrate not from the potentially biased U.S. data, we instead calibrate from the (e.g.) Danish data, we would predict an age 45+ mortality rate equal to 9.4% for the top 5% income counties, 9.6% for the top 1% of counties, and 9.0% for the top 5% of zip codes; all of these substantially larger than the median of comparison countries (8.2%). And while these estimates may themselves be biased upward because we are using fee-for-service Medicare claims data (rather than all enrollees including managed care patients), our alternative approach reinforces the earlier finding that even for privileged Americans, outcomes following AMI are no better than the median of the comparison countries.

**Citation:**

Drye, E.E., Normand, S.L.T., Wang, Y., Ross, J.S., Schreiner, G.C., Han, L., Rapp, M. and Krumholz, H.M., 2012. Comparison of hospital risk-standardized mortality rates calculated by using in-hospital and 30-day models: an observational study with implications for hospital profiling. *Annals of internal medicine*, 156(1\_Part\_1), pp.19-26.

**eAppendix 2.** List of 157 Highest-Incomes Counties in the US

| State | County ID | State / County Name        | Median Household Income in Dollars (2015) |
|-------|-----------|----------------------------|-------------------------------------------|
| 51.00 | 51107     | Loudoun County (VA)        | 125900.00                                 |
| 51.00 | 51610     | Falls Church city (VA)     | 122092.00                                 |
| 51.00 | 51059     | Fairfax County (VA)        | 112844.00                                 |
| 24.00 | 24027     | Howard County (MD)         | 110224.00                                 |
| 8.00  | 8035      | Douglas County (CO)        | 109926.00                                 |
| 35.00 | 35028     | Los Alamos County (NM)     | 107126.00                                 |
| 47.00 | 47187     | Williamson County (TN)     | 104367.00                                 |
| 51.00 | 51013     | Arlington County (VA)      | 104354.00                                 |
| 34.00 | 34019     | Hunterdon County (NJ)      | 102797.00                                 |
| 6.00  | 6085      | Santa Clara County (CA)    | 102191.00                                 |
| 34.00 | 34027     | Morris County (NJ)         | 101754.00                                 |
| 36.00 | 36059     | Nassau County (NY)         | 101568.00                                 |
| 6.00  | 6081      | San Mateo County (CA)      | 101133.00                                 |
| 6.00  | 6041      | Marin County (CA)          | 99868.00                                  |
| 51.00 | 51600     | Fairfax city (VA)          | 99671.00                                  |
| 51.00 | 51153     | Prince William County (VA) | 99206.00                                  |
| 34.00 | 34035     | Somerset County (NJ)       | 99059.00                                  |
| 24.00 | 24009     | Calvert County (MD)        | 98937.00                                  |
| 24.00 | 24031     | Montgomery County (MD)     | 98314.00                                  |
| 13.00 | 13117     | Forsyth County (GA)        | 97886.00                                  |
| 39.00 | 39041     | Delaware County (OH)       | 97679.00                                  |
| 51.00 | 51179     | Stafford County (VA)       | 95666.00                                  |
| 48.00 | 48157     | Fort Bend County (TX)      | 95117.00                                  |
| 27.00 | 27019     | Carver County (MN)         | 93857.00                                  |

|       |       |                           |          |
|-------|-------|---------------------------|----------|
| 49.00 | 49043 | Summit County (UT)        | 93235.00 |
| 25.00 | 25021 | Norfolk County (MA)       | 93187.00 |
| 27.00 | 27139 | Scott County (MN)         | 92898.00 |
| 48.00 | 48397 | Rockwall County (TX)      | 92150.00 |
| 18.00 | 18057 | Hamilton County (IN)      | 91844.00 |
| 24.00 | 24003 | Anne Arundel County (MD)  | 90825.00 |
| 42.00 | 42029 | Chester County (PA)       | 90555.00 |
| 6.00  | 6075  | San Francisco County (CA) | 90527.00 |
| 36.00 | 36079 | Putnam County (NY)        | 90497.00 |
| 8.00  | 8039  | Elbert County (CO)        | 90270.00 |
| 25.00 | 25017 | Middlesex County (MA)     | 90025.00 |
| 38.00 | 38105 | Williams County (ND)      | 89860.00 |
| 51.00 | 51061 | Fauquier County (VA)      | 89610.00 |
| 51.00 | 51510 | Alexandria city (VA)      | 89177.00 |
| 17.00 | 17093 | Kendall County (IL)       | 88773.00 |
| 34.00 | 34003 | Bergen County (NJ)        | 88512.00 |
| 27.00 | 27163 | Washington County (MN)    | 88329.00 |
| 24.00 | 24017 | Charles County (MD)       | 87941.00 |
| 36.00 | 36103 | Suffolk County (NY)       | 87634.00 |
| 33.00 | 33015 | Rockingham County (NH)    | 87103.00 |
| 48.00 | 48085 | Collin County (TX)        | 86823.00 |
| 34.00 | 34025 | Monmouth County (NJ)      | 86722.00 |
| 8.00  | 8014  | Broomfield County (CO)    | 86548.00 |
| 9.00  | 9001  | Fairfield County (CT)     | 86297.00 |
| 51.00 | 51075 | Goochland County (VA)     | 86257.00 |
| 51.00 | 51735 | Poquoson city (VA)        | 86135.00 |
| 25.00 | 25019 | Nantucket County (MA)     | 86014.00 |
| 36.00 | 36119 | Westchester County (NY)   | 85688.00 |
| 24.00 | 24013 | Carroll County (MD)       | 84506.00 |

|       |       |                                 |          |
|-------|-------|---------------------------------|----------|
| 34.00 | 34037 | Sussex County (NJ)              | 84431.00 |
| 21.00 | 21185 | Oldham County (KY)              | 84415.00 |
| 36.00 | 36087 | Rockland County (NY)            | 84249.00 |
| 24.00 | 24035 | Queen Anne's County (MD)        | 83914.00 |
| 24.00 | 24021 | Frederick County (MD)           | 83746.00 |
| 56.00 | 56039 | Teton County (WY)               | 83290.00 |
| 42.00 | 42091 | Montgomery County (PA)          | 83258.00 |
| 24.00 | 24037 | St. Mary's County (MD)          | 83148.00 |
| 56.00 | 56005 | Campbell County (WY)            | 83042.00 |
| 6.00  | 6013  | Contra Costa County (CA)        | 83036.00 |
| 20.00 | 20091 | Johnson County (KS)             | 83007.00 |
| 51.00 | 51199 | York County (VA)                | 83007.00 |
| 38.00 | 38053 | McKenzie County (ND)            | 82906.00 |
| 2.00  | 2110  | Juneau Borough (AK)             | 82892.00 |
| 9.00  | 9007  | Middlesex County (CT)           | 82878.00 |
| 17.00 | 17097 | Lake County (IL)                | 82160.00 |
| 51.00 | 51085 | Hanover County (VA)             | 81900.00 |
| 53.00 | 53033 | King County (WA)                | 81816.00 |
| 17.00 | 17043 | DuPage County (IL)              | 81616.00 |
| 9.00  | 9013  | Tolland County (CT)             | 81616.00 |
| 6.00  | 6001  | Alameda County (CA)             | 81462.00 |
| 39.00 | 39165 | Warren County (OH)              | 81383.00 |
| 19.00 | 19049 | Dallas County (IA)              | 81381.00 |
| 49.00 | 49029 | Morgan County (UT)              | 81358.00 |
| 51.00 | 51099 | King George County (VA)         | 81128.00 |
| 2.00  | 2016  | Aleutians West Census Area (AK) | 80695.00 |
| 13.00 | 13113 | Fayette County (GA)             | 80588.00 |
| 17.00 | 17111 | McHenry County (IL)             | 80513.00 |
| 42.00 | 42017 | Bucks County (PA)               | 80512.00 |

|       |       |                                |          |
|-------|-------|--------------------------------|----------|
| 55.00 | 55089 | Ozaukee County (WI)            | 80135.00 |
| 48.00 | 48329 | Midland County (TX)            | 79829.00 |
| 17.00 | 17133 | Monroe County (IL)             | 79686.00 |
| 27.00 | 27141 | Sherburne County (MN)          | 79495.00 |
| 51.00 | 51127 | New Kent County (VA)           | 79322.00 |
| 6.00  | 6111  | Ventura County (CA)            | 79285.00 |
| 48.00 | 48259 | Kendall County (TX)            | 79108.00 |
| 55.00 | 55133 | Waukesha County (WI)           | 78689.00 |
| 48.00 | 48491 | Williamson County (TX)         | 78531.00 |
| 34.00 | 34023 | Middlesex County (NJ)          | 78249.00 |
| 6.00  | 6059  | Orange County (CA)             | 78002.00 |
| 24.00 | 24025 | Harford County (MD)            | 77992.00 |
| 2.00  | 2020  | Anchorage Borough (AK)         | 77791.00 |
| 51.00 | 51145 | Powhatan County (VA)           | 77761.00 |
| 51.00 | 51095 | James City County (VA)         | 77668.00 |
| 56.00 | 56035 | Sublette County (WY)           | 77581.00 |
| 27.00 | 27037 | Dakota County (MN)             | 77576.00 |
| 46.00 | 46083 | Lincoln County (SD)            | 77540.00 |
| 48.00 | 48071 | Chambers County (TX)           | 77282.00 |
| 26.00 | 26093 | Livingston County (MI)         | 76934.00 |
| 38.00 | 38007 | Billings County (ND)           | 76913.00 |
| 38.00 | 38089 | Stark County (ND)              | 76844.00 |
| 34.00 | 34015 | Gloucester County (NJ)         | 76780.00 |
| 32.00 | 32015 | Lander County (NV)             | 76713.00 |
| 8.00  | 8097  | Pitkin County (CO)             | 76663.00 |
| 2.00  | 2170  | Matanuska-Susitna Borough (AK) | 76601.00 |
| 15.00 | 15003 | Honolulu County (HI)           | 76544.00 |
| 6.00  | 6069  | San Benito County (CA)         | 76521.00 |
| 32.00 | 32007 | Elko County (NV)               | 76518.00 |



|       |       |                             |          |
|-------|-------|-----------------------------|----------|
| 27.00 | 27171 | Wright County (MN)          | 76407.00 |
| 13.00 | 13219 | Oconee County (GA)          | 76371.00 |
| 24.00 | 24033 | Prince George's County (MD) | 76366.00 |
| 39.00 | 39055 | Geauga County (OH)          | 76315.00 |
| 17.00 | 17197 | Will County (IL)            | 76293.00 |
| 6.00  | 6061  | Placer County (CA)          | 76203.00 |
| 51.00 | 51177 | Spotsylvania County (VA)    | 76181.00 |
| 39.00 | 39159 | Union County (OH)           | 76116.00 |
| 53.00 | 53061 | Snohomish County (WA)       | 76053.00 |
| 48.00 | 48121 | Denton County (TX)          | 75898.00 |
| 38.00 | 38057 | Mercer County (ND)          | 75698.00 |
| 6.00  | 6017  | El Dorado County (CA)       | 75575.00 |
| 51.00 | 51685 | Manassas Park city (VA)     | 75429.00 |
| 44.00 | 44001 | Bristol County (RI)         | 75324.00 |
| 13.00 | 13073 | Columbia County (GA)        | 75232.00 |
| 8.00  | 8037  | Eagle County (CO)           | 75191.00 |
| 18.00 | 18011 | Boone County (IN)           | 75163.00 |
| 36.00 | 36061 | New York County (NY)        | 75136.00 |
| 49.00 | 49051 | Wasatch County (UT)         | 75112.00 |
| 51.00 | 51041 | Chesterfield County (VA)    | 75107.00 |
| 36.00 | 36091 | Saratoga County (NY)        | 75029.00 |
| 13.00 | 13057 | Cherokee County (GA)        | 74885.00 |
| 48.00 | 48173 | Glasscock County (TX)       | 74854.00 |
| 22.00 | 22005 | Ascension Parish (LA)       | 74852.00 |
| 34.00 | 34005 | Burlington County (NJ)      | 74844.00 |
| 25.00 | 25023 | Plymouth County (MA)        | 74736.00 |
| 55.00 | 55109 | St. Croix County (WI)       | 74624.00 |
| 46.00 | 46127 | Union County (SD)           | 74439.00 |
| 29.00 | 29183 | St. Charles County (MO)     | 74009.00 |

|       |       |                           |          |
|-------|-------|---------------------------|----------|
| 31.00 | 31153 | Sarpy County (NE)         | 73856.00 |
| 18.00 | 18063 | Hendricks County (IN)     | 73478.00 |
| 33.00 | 33011 | Hillsborough County (NH)  | 73474.00 |
| 27.00 | 27003 | Anoka County (MN)         | 73276.00 |
| 38.00 | 38025 | Dunn County (ND)          | 73135.00 |
| 11.00 | 11001 | District of Columbia (DC) | 73115.00 |
| 2.00  | 2068  | Denali Borough (AK)       | 73000.00 |
| 6.00  | 6055  | Napa County (CA)          | 72683.00 |
| 51.00 | 51683 | Manassas city (VA)        | 72562.00 |
| 29.00 | 29165 | Platte County (MO)        | 72548.00 |
| 48.00 | 48339 | Montgomery County (TX)    | 72428.00 |
| 8.00  | 8013  | Boulder County (CO)       | 72392.00 |
| 49.00 | 49011 | Davis County (UT)         | 72268.00 |
| 48.00 | 48003 | Andrews County (TX)       | 72184.00 |
| 34.00 | 34021 | Mercer County (NJ)        | 72172.00 |
| 44.00 | 44009 | Washington County (RI)    | 71951.00 |
| 17.00 | 17063 | Grundy County (IL)        | 71928.00 |
